# Supplementary material for: A roadmap for urban evolutionary ecology
Source: PubMed Central journal article supplement (PMC6383741; doi:10.1111/eva.12734), 2018-12-14
Supplement: EVA-12-384-s001.pdf [file EVA-12-384-s001.pdf]

## Supporting Information

Article title: A roadmap for urban evolutionary ecology.

**Table S1.** List of documented agents of selection associated with urbanization<sup>1</sup>.

| Causal 'agent' of selection     | Change in urban environment                              | Evolutionary or selective outcome                                                  | Test species                                                 | Experiment (E) or Observation (O) <sup>2</sup> | Reference                    |
|---------------------------------|----------------------------------------------------------|------------------------------------------------------------------------------------|--------------------------------------------------------------|------------------------------------------------|------------------------------|
| Altered biotic interactions     | Reduced herbivory                                        | Urban populations tend to have reduced extra-floral nectaries                      | Partridge pea ( <i>Chamaecrista fasciculata</i> )            | O                                              | Rios et al. (2008)           |
|                                 | Different predator community                             | Selection for more off-ground nests; no evolution documented.                      | Dark-eyed junco ( <i>Junco hyemalis</i> )                    | O                                              | Yeh et al. (2007)            |
|                                 | Increased florivory                                      | Floral characters evolve to reduce florivory.                                      | Carolina jasmine ( <i>Gelsemium sempervirens</i> )           | O                                              | Irwin et al. (2014)          |
|                                 | Greater pollen limitation                                | Selection for more flowers                                                         | Goldenrod gall fly ( <i>Eurosta solidaginus</i> )            | O                                              | Irwin et al. (2018)          |
|                                 | Loss of high trophic-level species                       | Directional selection for smaller galls                                            | Small ermine moth ( <i>Yponomeuta cagnagella</i> )           | O                                              | Start et al. (2018)          |
| Artificial light                | More artificial light                                    | Urban populations are less attracted to light                                      |                                                              | E & O                                          | Altermatt & Ebert (2016)     |
| Direct interactions with humans | More frequent interactions with humans                   | Populations evolve reduced wariness of humans                                      | Black swan ( <i>Cygnus atratus</i> )                         | E & O                                          | van Dongen et al. (2015)     |
| Habitat fragmentation           | Suitable habitat patches separated by impervious surface | Populations evolve lower dispersal                                                 | Holy hawksbeard ( <i>Crepis sancta</i> )                     | E & O                                          | Cheptou et al. (2008)        |
|                                 | Suitable habitat patches separated by impervious surface | Natural and sexual selection for flight endurance                                  | Azure damselfly ( <i>Coenagrion puella</i> )                 | O                                              | Tüzün et al., (2017a)        |
| Increased stress                | Elevated perturbations (i.e. noise, human interactions)  | Urban birds have reduced stress responses                                          | European blackbird ( <i>Turdus merula</i> )                  | O                                              | Partecke et al. (2006)       |
| Novel habitat                   | Access to 'underground' habitat                          | Multivariate life histories and behavioural divergence                             | Common house mosquito ( <i>Culex pipiens</i> complex)        | O                                              | Byrne & Nichols (1999)       |
|                                 | Fewer trees and more smooth, artificial, surfaces        | Urban populations evolve longer limbs and more toe lamellae                        | Crested anole ( <i>Anolis cristatellus</i> )                 | O                                              | Winchell et al. (2016, 2018) |
| Pollution                       | Urban surfaces covered in dark soot                      | Dark colour morph rises in frequency                                               | Peppered moth ( <i>Biston betularia</i> )                    | E & O                                          | Kettlewell (1955)            |
|                                 | Increased pentachlorobiphenyl (PCB) pollution            | Populations adapt to tolerate PCBs                                                 | Atlantic tomcod ( <i>Microgadus tomcod</i> )                 | O                                              | Wirgin et al. (2011)         |
|                                 | Increased pentachlorobiphenyl (PCB) pollution            | Populations adapt to tolerate PCBs                                                 | Atlantic killifish ( <i>Fundulus heteroclitus</i> )          | O                                              | Reid et al. (2016)           |
|                                 | Increased lead and zinc pollution                        | Selection for darker pigmentation in urban areas                                   | Feral pigeon ( <i>Columbia livia</i> )                       | E & O                                          | Chatelain et al. (2016)      |
|                                 | Increased toxic pollution                                | Adaptive evolution of detoxification enzymes                                       | African malaria mosquito ( <i>Anopheles gambiae</i> complex) | O                                              | Kamdem et al. (2017)         |
| Supplementary human food        | Food supplied during winter                              | Populations adapt to be less migratory (may also be caused by warmer microclimate) | European blackbird ( <i>Turdus merula</i> )                  | O                                              | Partecke & Gwinner 2007)     |
|                                 | Novel food items                                         | Relaxed selection on male colouration                                              | Northern cardinal ( <i>Cardinalis cardinalis</i> )           | O                                              | Jones et al., (2010)         |

|                |                                          |                                                                                    |                                                   |       |                              |
|----------------|------------------------------------------|------------------------------------------------------------------------------------|---------------------------------------------------|-------|------------------------------|
| Temperature    | Novel food items                         | Bimodality in beak shape lost, possibly due to relaxed selection                   | Medium ground finch ( <i>Geospiza fortis</i> )    | O     | de León et al. (2011)        |
|                | Novel food items                         | Evolution of genes involved in metabolic processes                                 | White-footed mouse ( <i>Peromyscus leucopus</i> ) | O     | Harris & Munshi-South (2017) |
|                | More bird feeders                        | Larger beaks evolve in urban areas                                                 | House finch ( <i>Carpodacus mexicanus</i> )       | E & O | Badyaev et al. (2008)        |
|                | More bird feeders                        | Larger beaks evolve in urban areas                                                 | Great tit ( <i>Parus major</i> )                  | O     | Bosse et al. (2017)          |
|                | Increased temperature                    | Urban populations of two of four species have faster growth at higher temperatures | Four species of chytinolytic fungi                | E     | McLean et al. (2005)         |
|                | Increased temperature                    | Urban populations evolve high heat tolerance                                       | Water flea ( <i>Daphnia magna</i> )               | E & O | Brans et al. (2017, 2018)    |
|                | Increased temperature                    | Urban populations evolve higher critical thermal maximum and minimum               | Acorn ant ( <i>Temnothorax curvispinosus</i> )    | E & O | Diamond et al. (2017, 2018)  |
|                | Increased temperature                    | Urban populations grow more quickly under warm temperatures                        | Azure damselfly ( <i>Coenagrion puella</i> )      | E & O | Tüzün et al. (2017b)         |
| Water velocity | Colder ground temperatures during winter | Urban populations evolve reduced cyanogenesis                                      | White clover ( <i>Trifolium repens</i> )          | O     | Thompson et al. (2016)       |
|                | Faster flowing water in urban streams    | Urban fish populations evolved more streamlines bodies                             | Blacknose dace ( <i>Rhinichthys obtusus</i> )     | E & O | Kern et al. (2018)           |
|                |                                          | Urban fish populations evolved deeper bodies                                       | Creek chub ( <i>Semotilus atromaculatus</i> )     |       |                              |

<sup>1</sup>We omit cases where organisms adapt in response to targeted human removal (e.g. pesticide resistance).

<sup>2</sup>Observational studies document the proposed environmental change between urban and non-urban areas, and experimental studies investigate how the putative agent of selection impacts fitness.

## References

- Altermatt, F., & Ebert, D. (2016). Reduced flight-to-light behaviour of moth populations exposed to long-term urban light pollution. *Biology Letters*, *12*, 1–4.  
<https://doi.org/10.1098/rsbl.2016.0111>
- Badyaev, A. V., Young, R. L., Oh, K. P., & Addison C. (2008). Evolution on a local scale: Developmental, functional, and genetic bases of divergence in bill form and associated changes in song structure between adjacent habitats. *Evolution*, *62*, 1951–1964.  
<https://doi.org/10.1111/j.1558-5646.2008.00428.x>
- Brans, K. I., Jansen, M., Vanoverbeke, J., Tüzün, N., Stoks, R., & De Meester, L. (2017). The heat is on: Genetic adaptation to urbanization mediated by thermal tolerance and body size. *Global Change Biology*, *23*, 5218–5227. <http://doi.org/10.1111/gcb.13784>
- Brans, K. I., Stoks, R., & De Meester, L. (2018). Urbanization drives genetic differentiation in physiology and structures the evolution of pace-of-life syndromes in the water flea *Daphnia magna*. *Proceedings of the Royal Society B: Biological Sciences*, *285*, 20180169.  
<http://doi.org/10.1098/rspb.2018.0169>
- Bosse, M., Spurgin, L. G., Laine, V. N., Cole, E. F., Firth, J. A., Gienapp, P., ..., Slate, J. (2017). Recent natural selection causes adaptive evolution of an avian polygenic trait. *Science*, *358*, 365–368. <https://doi.org/10.1126/science.aal3298>
- Byrne, K., & Nichols, R. A. (1999). *Culex pipiens* in London Underground tunnels: Differentiation between surface and subterranean populations. *Heredity*, *82*, 7–15.  
<http://doi.org/10.1038/sj.hdy.6884120>
- Chatelain, M., Gasparini, J., & Frantz, A. (2016). Do trace metals select for darker birds in urban areas? An experimental exposure to lead and zinc. *Global Change Biology*, *22*, 2380–2391.  
<https://doi.org/10.1111/gcb.13170>
- Cheptou, P.-O., Carrue, O., Rouifed, S., & Cantarel, A. (2008). Rapid evolution of seed dispersal in an urban environment in the weed *Crepis sancta*. *Proceedings of the National Academy of Sciences of the United States of America*, *105*, 3796–3799.  
<http://doi.org/10.1073/pnas.0708446105>
- Diamond, S. E., Chick, L., Perez, A., Strickler, S. A., & Martin, R. A. (2017). Rapid evolution of ant thermal tolerance across an urban-rural temperature cline. *Biological Journal of the Linnean Society*, *121*, 248–257. <http://doi.org/10.1093/biolinnean/blw047>

- Diamond, S. E., Chick, L. D., Perez, A., Strickler, S. A., & Martin, R. A. (2018). Evolution of thermal tolerance and its fitness consequences: Parallel and non-parallel responses to urban heat islands across three cities. *Proceedings of the Royal Society B: Biological Sciences*, 285, 20180036. <http://doi.org/10.1098/rspb.2018.0036>
- de León, L. F., Raeymaekers, J. A. M., Bermingham, E., Podos, J., Herrel, A., & Hendry, A. P. (2011). Exploring possible human influences on the evolution of Darwin's finches. *Evolution*, 65, 2258–2272. <https://doi.org/10.1111/j.1558-5646.2011.01297.x>
- Harris, S.E., & Munshi-South, J. (2017). Signatures of positive selection and local adaptation to urbanization in white-footed mice (*Peromyscus leucopus*). *Molecular Ecology*, 26, 6336–6350. <https://doi.org/10.1111/mec.14369>
- Irwin, R. E., Warren, P. S., & Adler, L. S. (2018). Phenotypic selection on floral traits in an urban landscape. *Proceedings of the Royal Society B: Biological Sciences*, 285, 20181239. <http://doi.org/10.1098/rspb.2018.1239>
- Irwin, R. E., Warren, P. S., Carper, A. L., & Adler, L. S. (2014). Plant-animal interactions in suburban environments: Implications for floral evolution. *Oecologia*, 174, 803–815. <https://doi.org/10.1007/s00442-013-2797-2>
- Jones, T. M., Rodewald, A. D., & Shustack, D. P. (2010). Variation in plumage coloration of northern cardinals in urbanizing landscapes. *Wilson Journal of Ornithology*, 122, 326–333. <http://doi.org/10.1676/09-082.1>
- Kamdem, C., Fouet, C., Gamez, S., & White, B. J. (2017). Pollutants and insecticides drive local adaptation in African malaria mosquitoes. *Molecular Biology and Evolution*, 34, 1261–1275. <https://doi.org/10.1093/molbev/msx087>
- Kern, E. M., & Langerhans, R. B. (2018). Urbanization drives contemporary evolution in stream fish. *Global Change Biology*, 24, 3791–3803. <https://doi.org/10.1111/gcb.14115>
- Kettlewell, H. B. D. (1955). Selection experiments on industrial melanism in the Lepidoptera. *Heredity*, 9, 323–342. <http://doi.org/10.1038/hdy.1955.36>
- McLean, M. A., Angilletta, M. J., & Williams, K. S. (2005). If you can't stand the heat, stay out of the city: Thermal reaction norms of chitinolytic fungi in an urban heat island. *Journal of Thermal Biology*, 30, 384–391. <https://doi.org/10.1016/j.jtherbio.2005.03.002>
- Partecke, J., & Gwinner, E. (2007). Increased sedentariness in European blackbirds following urbanization: A consequence of local adaptation? *Ecology*, 88, 882–890.

<https://doi.org/10.1890/06-1105>

Partecke, J., Schwabl, I., & Gwinner, E. (2006). Stress and the city: Urbanization and its effects on the stress physiology in European Blackbirds. *Ecology*, *87*, 1945–1952.

[https://doi.org/10.1890/0012-9658\(2006\)87\[1945:SATCUA\]2.0.CO;2](https://doi.org/10.1890/0012-9658(2006)87[1945:SATCUA]2.0.CO;2)

Reid, N. M., Proestou, D. A., Clark, B. W., Warren, W. C., Colbourne, J. K., Shaw, J. R., ... Whitehead, A. (2016). The genomic landscape of rapid repeated evolutionary adaptation to toxic pollution in wild fish. *Science*, *354*, 1305–1308.

<http://doi.org/10.1126/science.aah4993>

Rios, R. S., Marquis, R. J., & Flunker, J. C. (2008). Population variation in plant traits associated with ant attraction and herbivory in *Chamaecrista fasciculata* (Fabaceae). *Oecologia* *156*, 577–588. <https://doi.org/10.1007/s00442-008-1024-z>

Start, D., Bonner, C., Weis, A. E., & Gilbert, B. (2018). Consumer-resource interactions along urbanization gradients drive natural selection. *Evolution*, *72*, 1863–1873.

<https://doi.org/10.1111/evo.13544>

Thompson, K. A., Renaudin, M., & Johnson, M. T. J. (2016). Urbanization drives the evolution of parallel clines in plant populations. *Proceedings of the Royal Society B: Biological Sciences*, *283*, 20162180. <http://doi.org/10.1098/rspb.2016.2180>

Tüzün, N., Op de Beeck, L., & Stoks, R. (2017a). Sexual selection reinforces a higher flight endurance in urban damselflies. *Evolutionary Applications* *10*, 694–703.

<https://doi.org/10.1111/eva.12485>

Tüzün, N., Op de Beeck, L., Brans, K. I., Janssens, L., & Stoks, R. (2017b). Microgeographic differentiation in thermal performance curves between rural and urban populations of an aquatic insect. *Evolutionary Applications* *10*, 1–9. <https://doi.org/10.1111/eva.12512>

van Dongen, W. F. D., Robinson, R. W., Weston, M. A., Mulder, R. A., & Guay, P.-J. (2015). Variation at the DRD4 locus is associated with wariness and local site selection in urban black swans. *BMC Evolutionary Biology* *15*, 253. <https://doi.org/10.1186/s12862-015-05338>

Winchell, K. M., Maayan, I., Fredette, J. R., & Revell, L. J. (2018). Linking locomotor performance to morphological shifts in urban lizards. *Proceedings of the Royal Society B: Biological Sciences*, *285*, 20180229. <http://doi.org/10.1098/rspb.2018.0229>

Winchell, K. M., Reynolds, R. G., Prado-Irwin, S. R., Puente-Rolón, A. R., & Revell, L. J. (2016). Phenotypic shifts in urban areas in the tropical lizard *Anolis cristatellus*. *Evolution*,

70, 1009–1022. <http://doi.org/10.1111/evo.12925>

Wirgin, I., Roy, N. K., Loftus, M., Chambers, R. C., Franks, D. G., & Hahn, M. E. (2011).

Mechanistic basis of resistance to PCBs in Atlantic tomcod from the Hudson

River. *Science*, 331, 1322-1325. <http://doi.org/10.1126/science.1197296>

Yeh, P. J., Hauber, M. E., & Price, T. D. (2007). Alternative nesting behaviours following colonisation of a novel environment by a passerine bird. *Oikos* 116, 1473–1480.

<https://doi.org/10.1111/j.0030-1299.2007.15910.x>
